# Supplementary material for: Premature ovarian insufficiency is associated with global alterations in the regulatory landscape and gene expression in balanced X-autosome translocations
Source: PubMed Central journal article supplement (PMC10197467; doi:10.1186/s13072-023-00493-8), 2023-05-19
Supplement: 13072_2023_493_MOESM1_ESM.pdf [file 13072_2023_493_MOESM1_ESM.pdf]

## **Premature ovarian insufficiency is associated with global alterations in the regulatory landscape and gene expression in balanced X-autosome translocations**

Adriana Di-Battista<sup>1,4\*</sup>, Bianca Pereira Favilla<sup>1\*</sup>, Malú Zamariolli<sup>1</sup>, Natália Nunes<sup>1</sup>, Alexandre Defelicibus<sup>3</sup>, Lucia Armelin-Correa<sup>2</sup>, Israel Tojal da Silva<sup>3</sup>, Alexandre Reymond<sup>4\*</sup>, Mariana Moyses-Oliveira<sup>1\*</sup>, Maria Isabel Melaragno<sup>1\*</sup>

<sup>1</sup>Genetics Division, Department of Morphology and Genetics, Universidade Federal de São Paulo, São Paulo, Brazil

<sup>2</sup>Department of Biological Sciences, Universidade Federal São Paulo, Diadema, Brazil

<sup>3</sup>Laboratory of Bioinformatics and Computational Biology, A. C. Camargo Cancer Center, São Paulo, Brazil.

<sup>4</sup>Center for Integrative Genomics, University of Lausanne, Lausanne, Switzerland

\*These authors contributed equally to this work.

### **Corresponding author:**

Maria Isabel Melaragno, Genetics Division, Department of Morphology and Genetics, Universidade Federal de Sao Paulo, 04023-900, Sao Paulo, Brazil.

E-mail: melaragno.maria@unifesp.br

**Additional Table 1.** Prediction of TAD disruption and position effect candidate genes

| <b>Patient</b> | <b>Breakpoint hg19</b>    | <b>Cell type invariant TADs<br/>(Akdemir et al. 2020)</b> | <b>Chromatin states<br/>(Akdemir et al. 2020)</b> | <b>POI candidate<br/>genes</b> |
|----------------|---------------------------|-----------------------------------------------------------|---------------------------------------------------|--------------------------------|
| 1              | chrX: 69030057-69030506   | 68650000-71350000                                         | Active                                            | <i>FOXO4</i>                   |
|                | chr7: 19473907-19474002   | 18375000-19625000                                         | Low/quiescent                                     |                                |
| 2              | chrX: 74032815-74032826   | 73725000-75350000                                         | Low/quiescent                                     | <i>FGF16</i>                   |
|                | chr3: 96016770-96016778   | 90600000-90600000                                         | Low/quiescent                                     |                                |
| 3              | chrX: 74632259-74632262   | 73725000-75350000                                         | Low/quiescent                                     |                                |
|                | chr9: centromere          | centromere                                                | centromere                                        |                                |
| 4              | chrX: 79172419-79172439   | 77350000-79800000                                         | Low/quiescent                                     |                                |
|                | chr1: 36191476-36191754   | 35250000-36475000                                         | Active                                            |                                |
| 5              | chrX: 84343038-84343242   | 84300000-84775000                                         | Low/quiescent                                     | <i>POF1B</i>                   |
|                | chr11: 87320005-87320006  | 87100000-88675000                                         | Low/quiescent                                     |                                |
| 6              | chrX: 94378044-94378046   | 88950000-99675000                                         | Low/quiescent                                     | <i>DIAPH2</i>                  |
|                | chr2: 105854325-105854326 | 105625000-107150000                                       | Low-active                                        |                                |

**Additional Table 2.** Expression levels in FPKM of POI2 genes.

| <b>POI2 genes</b> | <b>Mean Controls</b> | <b>Mean Patients</b> | <b>Fold Change</b> | <b>Genes with downregulation trend</b> | <b>Fold Change</b> | <b>Genes with upregulation trend</b> | <b>Fold Change</b> |
|-------------------|----------------------|----------------------|--------------------|----------------------------------------|--------------------|--------------------------------------|--------------------|
| ABCB7             | 18104.4              | 17154                | 0.947504474        | CITED1                                 | 0.15625            | INGX                                 | 1.25               |
| APOOL             | 245                  | 317.75               | 1.296938776        | RPS6KA6                                | 0.162337662        | MAP2K4P1                             | 1.283783784        |
| ATP7A             | 6265.2               | 5271.75              | 0.841433633        | MAGEE1                                 | 0.297833935        | APOOL                                | 1.296938776        |
| ATRX              | 46331.2              | 37510                | 0.809605622        | PHKA1                                  | 0.33315565         | PGAM4                                | 1.31097561         |
| BRWD3             | 12412                | 10943.75             | 0.881707219        | NHSL2                                  | 0.362318841        | PABPC1P3                             | 1.380208333        |
| CHIC1             | 3835.2               | 3210                 | 0.83698373         | ZNF711                                 | 0.399952245        | RPS26P11                             | 1.666666667        |
| CHM               | 7100.4               | 5563.5               | 0.783547406        | DGAT2L6                                | 0.416666667        | P2RY4                                | 1.770833333        |
| CITED1            | 16                   | 2.5                  | 0.15625            | RPSAP14                                | 0.416666667        |                                      |                    |
| COX7B             | 7384.2               | 5574.75              | 0.754956529        | POF1B                                  | 0.480113636        |                                      |                    |
| CXCR3             | 656.4                | 515                  | 0.784582572        | HMG5                                   | 0.4867717          |                                      |                    |
| CYSLTR1           | 1061.2               | 557.5                | 0.525348662        | RPA4                                   | 0.514705882        |                                      |                    |
| DGAT2L6           | 5.4                  | 2.25                 | 0.416666667        | NAP1L2                                 | 0.516975309        |                                      |                    |
| DIAPH2            | 4866                 | 4111.25              | 0.844893136        | CYSLTR1                                | 0.525348662        |                                      |                    |
| DLG3              | 2818                 | 3280                 | 1.163946061        | LPAR4                                  | 0.568181818        |                                      |                    |
| EFNB1             | 54.6                 | 41.75                | 0.764652015        | STARD8                                 | 0.583976834        |                                      |                    |
| EIF4A1P10         | 47.4                 | 43.25                | 0.912447257        | PIN4                                   | 0.673515982        |                                      |                    |
| ERCC6L            | 958                  | 728                  | 0.759916493        | SOCS5P4                                | 0.674157303        |                                      |                    |
| FOXO4             | 1832                 | 1819                 | 0.99290393         | SERBP1P1                               | 0.691176471        |                                      |                    |
| FTX               | 1308                 | 1057.5               | 0.808486239        | TAF9B                                  | 0.703876202        |                                      |                    |
| GPR174            | 528.8                | 403.75               | 0.76352118         | RPL21P134                              | 0.714285714        |                                      |                    |
| HDAC8             | 12344                | 10360                | 0.839274141        | KIF4A                                  | 0.731472759        |                                      |                    |
| HDX               | 767                  | 673.75               | 0.878422425        | VDAC1P1                                | 0.732421875        |                                      |                    |
| HK2P1             | 5.4                  | 5.25                 | 0.972222222        | MED12                                  | 0.752587507        |                                      |                    |
| HMG5              | 4709.6               | 2292.5               | 0.4867717          | COX7B                                  | 0.754956529        |                                      |                    |
| IGBP1             | 5250.4               | 5675.5               | 1.08096526         | ERCC6L                                 | 0.759916493        |                                      |                    |
| IL2RG             | 106196.4             | 95910.75             | 0.903145022        | GPR174                                 | 0.76352118         |                                      |                    |

|           |          |           |             |        |             |  |  |
|-----------|----------|-----------|-------------|--------|-------------|--|--|
| INGX      | 2.4      | 3         | 1.25        | EFNB1  | 0.764652015 |  |  |
| ITGB1BP2  | 325      | 313.75    | 0.965384615 | CHM    | 0.783547406 |  |  |
| ITM2A     | 10694.4  | 10387.5   | 0.971302738 | CXCR3  | 0.784582572 |  |  |
| JPX       | 7320     | 6075      | 0.829918033 | SNX12  | 0.798080341 |  |  |
| KIF4A     | 3821.4   | 2795.25   | 0.731472759 | PDZD11 | 0.801175569 |  |  |
| LPAR4     | 8.8      | 5         | 0.568181818 | FTX    | 0.808486239 |  |  |
| MAGEE1    | 110.8    | 33        | 0.297833935 |        |             |  |  |
| MAGT1     | 13840.8  | 12419.25  | 0.897292787 |        |             |  |  |
| MAP2K4P1  | 14.8     | 19        | 1.283783784 |        |             |  |  |
| MED12     | 34608.6  | 26046     | 0.752587507 |        |             |  |  |
| NAP1L2    | 129.6    | 67        | 0.516975309 |        |             |  |  |
| NHSL2     | 55.2     | 20        | 0.362318841 |        |             |  |  |
| NLGN3     | 515      | 512.5     | 0.995145631 |        |             |  |  |
| NONO      | 219873   | 185152.5  | 0.842088387 |        |             |  |  |
| OGT       | 295526   | 278866.5  | 0.943627633 |        |             |  |  |
| P2RY10    | 12225.6  | 12626     | 1.032750949 |        |             |  |  |
| P2RY4     | 4.8      | 8.5       | 1.770833333 |        |             |  |  |
| PABPC1P3  | 19.2     | 26.5      | 1.380208333 |        |             |  |  |
| PBDC1     | 1988.8   | 1853.5    | 0.931969027 |        |             |  |  |
| PDZD11    | 3130.4   | 2508      | 0.801175569 |        |             |  |  |
| PGAM4     | 8.2      | 10.75     | 1.31097561  |        |             |  |  |
| PGK1      | 334976.6 | 326369.75 | 0.974306116 |        |             |  |  |
| PHKA1     | 469      | 156.25    | 0.33315565  |        |             |  |  |
| PIN4      | 2759.4   | 1858.5    | 0.673515982 |        |             |  |  |
| PJA1      | 3172.4   | 3067.75   | 0.967012357 |        |             |  |  |
| POF1B     | 176      | 84.5      | 0.480113636 |        |             |  |  |
| RLIM      | 5082     | 4536.5    | 0.89266037  |        |             |  |  |
| RPA4      | 6.8      | 3.5       | 0.514705882 |        |             |  |  |
| RPL21P134 | 1.4      | 1         | 0.714285714 |        |             |  |  |
| RPL31P63  | 20       | 20        | 1           |        |             |  |  |

|          |         |          |             |  |  |  |
|----------|---------|----------|-------------|--|--|--|
| RPS23P8  | 243.4   | 264.5    | 1.086688578 |  |  |  |
| RPS26P11 | 0.6     | 1        | 1.666666667 |  |  |  |
| RPS4X    | 385378  | 379470   | 0.984669597 |  |  |  |
| RPS6KA6  | 61.6    | 10       | 0.162337662 |  |  |  |
| RPSAP14  | 0.6     | 0.25     | 0.416666667 |  |  |  |
| RPSAP15  | 48.4    | 39.5     | 0.816115702 |  |  |  |
| SERBP1P1 | 17      | 11.75    | 0.691176471 |  |  |  |
| SH3BGRL  | 25796.8 | 21651    | 0.839290145 |  |  |  |
| SNX12    | 8439    | 6735     | 0.798080341 |  |  |  |
| SOCS5P4  | 17.8    | 12       | 0.674157303 |  |  |  |
| STARD8   | 259     | 151.25   | 0.583976834 |  |  |  |
| TAF1     | 60060   | 60306.75 | 1.004108392 |  |  |  |
| TAF9B    | 1996.8  | 1405.5   | 0.703876202 |  |  |  |
| TTC3P1   | 115.2   | 117      | 1.015625    |  |  |  |
| UPRT     | 4772.8  | 4204     | 0.880824673 |  |  |  |
| VDAC1P1  | 25.6    | 18.75    | 0.732421875 |  |  |  |
| XIST     | 193024  | 159287.5 | 0.825221216 |  |  |  |
| YIPF6    | 6241.2  | 5540.5   | 0.887729924 |  |  |  |
| ZMYM3    | 32730   | 30715    | 0.938435686 |  |  |  |
| ZNF711   | 1047    | 418.75   | 0.399952245 |  |  |  |
|          |         |          |             |  |  |  |

**Additional Table 3.** Differentially expressed genes (FDR < 0.15).

| <b>ensembl ID</b> | <b>Gene Name</b> | <b>log2 Fold Change</b> | <b>p Value</b> | <b>p adjusted (FDR)</b> |
|-------------------|------------------|-------------------------|----------------|-------------------------|
| ENSG00000211972   | IGHV3-66         | -9.533667354            | 2.76E-06       | 0.004168755             |
| ENSG00000211664   | IGLV2-18         | -9.413947135            | 4.19E-04       | 0.103177711             |
| ENSG00000243238   | IGKV2-30         | -8.83600783             | 8.02E-06       | 0.007219604             |
| ENSG00000211965   | IGHV3-49         | -8.073972678            | 5.63E-07       | 0.001165573             |
| ENSG00000215700   | PNRC2            | -7.68079954             | 7.29E-13       | 7.54E-09                |
| ENSG00000223350   | IGLV9-49         | -6.805475329            | 2.82E-06       | 0.004168755             |
| ENSG00000211945   | IGHV1-18         | -6.769553337            | 1.28E-10       | 8.81E-07                |
| ENSG00000152932   | RAB3C            | -6.446113007            | 3.09E-04       | 0.09411575              |
| ENSG00000243466   | IGKV1-5          | -6.204495287            | 2.37E-05       | 0.017543206             |
| ENSG00000137809   | ITGA11           | -5.37853033             | 2.26E-06       | 0.003901306             |
| ENSG00000147402   | GABRQ            | -5.342446493            | 1.47E-04       | 0.05963325              |
| ENSG00000170128   | GPR25            | -5.304332574            | 2.50E-04       | 0.083307287             |
| ENSG00000187416   | LHFPL3           | -5.302089592            | 9.66E-05       | 0.045422791             |
| ENSG00000224373   | IGHV4-59         | -5.196626235            | 3.67E-04       | 0.096378761             |
| ENSG00000186281   | GPAT2            | -5.151820487            | 1.91E-07       | 5.93E-04                |
| ENSG00000181634   | TNFSF15          | -5.081035676            | 1.49E-05       | 0.012355267             |
| ENSG00000175029   | CTBP2            | -4.768367692            | 1.09E-09       | 5.65E-06                |
| ENSG00000154096   | THY1             | -4.713417029            | 7.09E-05       | 0.039685932             |
| ENSG00000125845   | BMP2             | -4.702559191            | 1.09E-06       | 0.0020425               |
| ENSG00000211949   | IGHV3-23         | -4.558011299            | 4.95E-05       | 0.030125489             |
| ENSG00000125378   | BMP4             | -4.022651136            | 8.73E-05       | 0.045246703             |
| ENSG00000102362   | SYTL4            | -3.962096381            | 5.32E-04       | 0.122342846             |
| ENSG00000134532   | SOX5             | -3.89170101             | 4.59E-07       | 0.001055042             |
| ENSG00000125430   | HS3ST3B1         | -3.63211782             | 4.03E-05       | 0.02527202              |
| ENSG00000061337   | LZTS1            | -3.547656947            | 2.56E-05       | 0.018251268             |
| ENSG00000006740   | ARHGAP44         | -3.07704319             | 1.02E-05       | 0.008799439             |
| ENSG00000147642   | SYBU             | -2.867944344            | 2.37E-04       | 0.080456808             |
| ENSG00000184185   | KCNJ12           | -2.730321951            | 1.44E-04       | 0.05963325              |
| ENSG00000157240   | FZD1             | -2.653631949            | 5.57E-06       | 0.006066253             |
| ENSG00000132744   | ACY3             | -2.519806618            | 3.88E-05       | 0.02527202              |
| ENSG00000182985   | CADM1            | -2.399203596            | 3.34E-04       | 0.095434155             |
| ENSG00000198722   | UNC13B           | -2.370183805            | 2.85E-04       | 0.088403056             |
| ENSG00000135540   | NHSL1            | -2.259915149            | 6.43E-06       | 0.006335055             |
| ENSG00000142156   | COL6A1           | -2.158003826            | 7.69E-06       | 0.007219604             |
| ENSG00000198598   | MMP17            | -2.150832048            | 3.43E-04       | 0.095434155             |
| ENSG00000197381   | ADARB1           | -2.149161706            | 3.71E-04       | 0.096378761             |
| ENSG00000128512   | DOCK4            | -2.087129596            | 1.03E-04       | 0.045552166             |
| ENSG00000050730   | TNIP3            | -2.041526282            | 0.000472978    | 0.112530712             |
| ENSG00000149212   | SESN3            | -2.027177014            | 5.56E-06       | 0.006066253             |
| ENSG00000167972   | ABCA3            | -1.908830256            | 6.48E-04       | 0.141729087             |
| ENSG00000177932   | ZNF354C          | -1.870896521            | 5.52E-04       | 0.125558858             |
| ENSG00000101004   | NINL             | -1.708764987            | 3.40E-04       | 0.095434155             |
| ENSG00000136205   | TNS3             | -1.627554261            | 2.20E-05       | 0.01683703              |
| ENSG00000198934   | MAGEE1           | -1.540915593            | 7.31E-08       | 3.03E-04                |

|                 |          |              |          |             |
|-----------------|----------|--------------|----------|-------------|
| ENSG00000035403 | VCL      | -1.537064846 | 5.50E-06 | 0.006066253 |
| ENSG00000179144 | GIMAP7   | -1.516693406 | 3.88E-04 | 0.097874822 |
| ENSG00000198720 | ANKRD13B | -1.199472103 | 3.57E-04 | 0.096098453 |
| ENSG00000166086 | JAM3     | -1.181024693 | 9.04E-05 | 0.045422791 |
| ENSG00000119771 | KLHL29   | -1.065809716 | 3.86E-04 | 0.097874822 |
| ENSG00000196924 | FLNA     | -1.016178856 | 1.02E-04 | 0.045552166 |
| ENSG00000005882 | PKD2     | -0.900358132 | 2.81E-04 | 0.088403056 |
| ENSG00000100031 | GGT1     | -0.758497312 | 3.46E-04 | 0.095434155 |
| ENSG00000188191 | PRKAR1B  | -0.726096052 | 2.05E-04 | 0.072608715 |
| ENSG00000165025 | SYK      | -0.669763994 | 6.93E-04 | 0.146000747 |
| ENSG00000197122 | SRC      | -0.647760965 | 3.91E-05 | 0.02527202  |
| ENSG00000188807 | TMEM201  | -0.647033517 | 8.74E-05 | 0.045246703 |
| ENSG00000160326 | SLC2A6   | -0.53672976  | 9.34E-05 | 0.045422791 |
| ENSG00000167566 | NCKAP5L  | -0.531837288 | 5.62E-05 | 0.033224797 |
| ENSG00000127328 | RAB3IP   | -0.493298314 | 2.00E-07 | 5.93E-04    |
| ENSG00000160193 | WDR4     | -0.492334752 | 3.93E-04 | 0.097944358 |
| ENSG00000115539 | PDCL3    | -0.411517596 | 6.20E-04 | 0.137987445 |
| ENSG00000150753 | CCT5     | -0.380813646 | 1.03E-04 | 0.045552166 |
| ENSG00000159131 | GART     | -0.343925791 | 3.57E-04 | 0.096098453 |
| ENSG00000132792 | CTNBL1   | -0.314876091 | 9.47E-05 | 0.045422791 |
| ENSG00000130313 | PGLS     | -0.273338429 | 2.64E-04 | 0.086611082 |
| ENSG00000131381 | ZFYVE20  | 0.28395299   | 1.65E-04 | 0.065505878 |
| ENSG00000184205 | TSPYL2   | 0.462456943  | 4.50E-04 | 0.108360782 |
| ENSG00000108474 | PIGL     | 0.480006179  | 1.79E-04 | 0.066321486 |
| ENSG00000172071 | EIF2AK3  | 0.516562521  | 6.81E-04 | 0.145249158 |
| ENSG00000183624 | HMCES    | 0.623769468  | 8.29E-05 | 0.04514248  |
| ENSG00000072134 | EPN2     | 0.639355268  | 3.72E-04 | 0.096378761 |
| ENSG00000180773 | SLC36A4  | 0.721759776  | 1.88E-04 | 0.06827698  |
| ENSG00000214783 | POLR2J4  | 0.898324921  | 1.42E-04 | 0.05963325  |
| ENSG00000069974 | RAB27A   | 1.165145493  | 2.90E-07 | 7.50E-04    |
| ENSG00000117586 | TNFSF4   | 1.266610279  | 6.50E-04 | 0.141729087 |
| ENSG00000189337 | KAZN     | 1.271969036  | 1.75E-04 | 0.065837241 |
| ENSG00000205683 | DPF3     | 1.422850639  | 1.74E-04 | 0.065837241 |
| ENSG00000027075 | PRKCH    | 1.495063608  | 2.86E-04 | 0.088403056 |
| ENSG00000155093 | PTPRN2   | 1.606310124  | 6.56E-05 | 0.037715134 |
| ENSG00000151948 | GLT1D1   | 1.628656996  | 6.03E-06 | 0.006242621 |
| ENSG00000239704 | CDRT4    | 1.675453953  | 6.98E-04 | 0.146000747 |
| ENSG00000130595 | TNNT3    | 1.811220735  | 3.12E-06 | 0.004309167 |
| ENSG00000123843 | C4BPB    | 2.02280933   | 3.99E-06 | 0.005158142 |
| ENSG00000169213 | RAB3B    | 2.668818836  | 4.86E-04 | 0.114347835 |
| ENSG00000119535 | CSF3R    | 3.317025569  | 5.36E-13 | 7.54E-09    |

**Additional Table 4.** Enriched transcriptional networks in LCLs observed with DEGs.

| <b>ID</b>  | <b>Name</b>                                                    | <b>p value</b> | <b>FDR q value</b> |
|------------|----------------------------------------------------------------|----------------|--------------------|
| GO:0051251 | positive regulation of lymphocyte activation                   | 2.97E-07       | 0.001514           |
| GO:0050871 | positive regulation of B cell activation                       | 7.43E-07       | 0.001896           |
| GO:0006958 | complement activation, classical pathway                       | 9.30E-07       | 0.001581           |
| GO:0002455 | humoral immune response mediated by circulating immunoglobulin | 1.04E-06       | 0.001322           |
| GO:0050864 | regulation of B cell activation                                | 3.17E-06       | 0.00323            |
| GO:0050853 | B cell receptor signaling pathway                              | 5.36E-06       | 0.004559           |
| GO:0038096 | Fc-gamma receptor signaling pathway involved in phagocytosis   | 2.20E-05       | 0.016009           |
| GO:0038094 | Fc-gamma receptor signaling pathway                            | 2.29E-05       | 0.014615           |
| GO:0002431 | Fc receptor mediated stimulatory signaling pathway             | 2.39E-05       | 0.013549           |
| GO:0061035 | regulation of cartilage development                            | 3.25E-05       | 0.016578           |
| GO:0061036 | positive regulation of cartilage development                   | 4.83E-05       | 0.022385           |
| GO:0017157 | regulation of exocytosis                                       | 6.52E-05       | 0.027726           |
| GO:0099024 | plasma membrane invagination                                   | 7.77E-05       | 0.030511           |
| GO:0006911 | phagocytosis, engulfment                                       | 8.14E-05       | 0.029664           |
| GO:2000257 | regulation of protein activation cascade                       | 9.73E-05       | 0.033116           |
| GO:0030449 | regulation of complement activation                            | 1.02E-04       | 0.032431           |
| GO:0007229 | integrin-mediated signaling pathway                            | 1.08E-04       | 0.032484           |
| GO:0050851 | antigen receptor-mediated signaling pathway                    | 1.12E-04       | 0.031786           |
| GO:0002920 | regulation of humoral immune response                          | 1.21E-04       | 0.03238            |
| GO:0002697 | regulation of immune effector process                          | 1.26E-04       | 0.032065           |
| GO:0002673 | regulation of acute inflammatory response                      | 1.66E-04       | 0.040404           |
| GO:0070613 | regulation of protein processing                               | 2.16E-04       | 0.05015            |
| GO:0051240 | positive regulation of multicellular organismal process        | 2.22E-04       | 0.049286           |
| GO:0002062 | chondrocyte differentiation                                    | 2.25E-04       | 0.047788           |
| GO:0006909 | phagocytosis                                                   | 2.77E-04       | 0.056506           |



**Additional Table 5.** Differential peaks for the three histone marks (FDR < 0.05, fold-change  $\geq |1|$ ) and corresponding chromatin states.

| Chromosome | Peak start | Peak end  | chrband  | Fold Change | FDR      | gene_id         | Gene symbol     | Histone mark | ChromHMM LCL           |
|------------|------------|-----------|----------|-------------|----------|-----------------|-----------------|--------------|------------------------|
| 2          | 227703939  | 227704439 | 2q36.3   | -1          | 0.0178   | ENSG00000144468 | <i>RHBDD1</i>   | H3K27ac      | Active TSS             |
| 17         | 12769562   | 12770062  | 17p12    | -4.73       | 0.00446  | ENSG00000006740 | <i>ARHGAP44</i> | H3K27ac      | Active TSS             |
| X          | 122318346  | 122318846 | Xq25     | 3.91        | 8.60E-06 | ENSG00000125675 | <i>GRIA3</i>    | H3K27ac      | Active TSS             |
| X          | 122318191  | 122318691 | Xq25     | 2.25        | 0.00623  | ENSG00000125675 | <i>GRIA3</i>    | H3K4me3      | Active TSS             |
| 22         | 49447820   | 49448320  | 22q13.33 | -3.94       | 1.93E-06 | N/A             | N/A             | H3K4me3      | Enhancers/Active TSS   |
| X          | 21456568   | 21457068  | Xp22.12  | -2.31       | 0.0145   | ENSG00000149970 | <i>CNKSR2</i>   | H3K27ac      | Enhancers/Active TSS   |
| 5          | 76169968   | 76170468  | 5q13.3   | -2.53       | 0.0193   | ENSG00000171643 | <i>S100Z</i>    | H3K27ac      | Flanking active TSS    |
| 1          | 108416020  | 108416520 | 1p13.3   | -2.72       | 0.0301   | ENSG00000134215 | <i>VAV3</i>     | H3K27ac      | Flanking active TSS    |
| 1          | 157545701  | 157546201 | 1q23.1   | 1.21        | 0.00678  | ENSG00000163518 | <i>FCRL4</i>    | H3K27ac      | Flanking active TSS    |
| 1          | 157565591  | 157566091 | 1q23.1   | 1.21        | 0.0089   | ENSG00000163518 | <i>FCRL4</i>    | H3K27ac      | Flanking active TSS    |
| 1          | 165811470  | 165811970 | 1q24.1   | -1.83       | 0.00598  | ENSG00000143179 | <i>UCK2</i>     | H3K27ac      | Flanking active TSS    |
| 2          | 20413186   | 20413686  | 2p24.1   | -1.7        | 0.00779  | ENSG00000115884 | <i>SDC1</i>     | H3K27ac      | Flanking active TSS    |
| 3          | 4793064    | 4793564   | 3p26.1   | -1.08       | 0.0247   | ENSG00000150995 | <i>ITPR1</i>    | H3K27ac      | Flanking active TSS    |
| 6          | 166954743  | 166955243 | 6q27     | -3.43       | 7.16E-12 | ENSG00000071242 | <i>RPS6KA2</i>  | H3K27ac      | Flanking active TSS    |
| 7          | 6621309    | 6621809   | 7p22.1   | -2.96       | 0.00307  | ENSG00000136247 | <i>ZDHHC4</i>   | H3K27ac      | Flanking active TSS    |
| 10         | 13802765   | 13803265  | 10p13    | -1.81       | 0.000556 | ENSG00000151474 | <i>FRMD4A</i>   | H3K27ac      | Flanking active TSS    |
| 10         | 121298651  | 121299151 | 10q26.11 | -2.08       | 0.0233   | ENSG00000148908 | <i>RGS10</i>    | H3K27ac      | Flanking active TSS    |
| 16         | 67359508   | 67360008  | 16q22.1  | -2.95       | 0.0129   | ENSG00000168676 | <i>KCTD19</i>   | H3K27ac      | Flanking active TSS    |
| 22         | 38609726   | 38610226  | 22q13.1  | -1.45       | 0.0292   | ENSG00000185022 | <i>MAFF</i>     | H3K27ac      | Flanking active TSS    |
| 6          | 166954938  | 166955438 | 6q27     | -2.52       | 0.0491   | ENSG00000071242 | <i>RPS6KA2</i>  | H3K4me3      | Flanking active TSS    |
| 8          | 141608435  | 141608935 | 8q24.3   | 3.23        | 0.00422  | ENSG00000123908 | <i>AGO2</i>     | H3K4me3      | Flanking active TSS    |
| 16         | 67360072   | 67360572  | 16q22.1  | -2.37       | 0.00112  | ENSG00000168676 | <i>KCTD19</i>   | H3K4me3      | Flanking active TSS    |
| 7          | 6620983    | 6621483   | 7p22.1   | -1.42       | 0.0469   | ENSG00000136247 | <i>ZDHHC4</i>   | H3K4me1      | Flanking active TSS    |
| 1          | 155959391  | 155959891 | 1q22     | -1.29       | 0.00604  | ENSG00000116584 | <i>ARHGEF2</i>  | H3K27ac      | Flanking TSS/Enhancers |
| 2          | 135339112  | 135339612 | 2q21.3   | -2.01       | 0.026    | ENSG00000152128 | <i>TMEM163</i>  | H3K27ac      | Flanking TSS/Enhancers |

|    |           |           |          |       |          |                 |                  |         |                        |
|----|-----------|-----------|----------|-------|----------|-----------------|------------------|---------|------------------------|
| 2  | 214604989 | 214605489 | 2q34     | -2.16 | 0.00125  | ENSG00000144451 | <i>SPAG16</i>    | H3K27ac | Flanking TSS/Enhancers |
| 2  | 219197581 | 219198081 | 2q35     | 1.51  | 0.032    | ENSG00000127838 | <i>PNKD</i>      | H3K27ac | Flanking TSS/Enhancers |
| 2  | 233100400 | 233100900 | 2q37.1   | -2.38 | 0.00464  | ENSG00000144535 | <i>DIS3L2</i>    | H3K27ac | Flanking TSS/Enhancers |
| 3  | 61165829  | 61166329  | 3p14.2   | -1.27 | 0.0196   | ENSG00000189283 | <i>FHIT</i>      | H3K27ac | Flanking TSS/Enhancers |
| 3  | 93789307  | 93789807  | 3q11.2   | -1.97 | 6.48E-05 | ENSG00000178694 | <i>NSUN3</i>     | H3K27ac | Flanking TSS/Enhancers |
| 3  | 171093842 | 171094342 | 3q26.31  | -1.74 | 0.0312   | ENSG00000154310 | <i>TNIK</i>      | H3K27ac | Flanking TSS/Enhancers |
| 3  | 189427916 | 189428416 | 3q28     | -1.39 | 0.0477   | ENSG00000073282 | <i>TP63</i>      | H3K27ac | Flanking TSS/Enhancers |
| 5  | 1480019   | 1480519   | 5p15.33  | -1.54 | 0.042    | ENSG00000153395 | <i>LPCAT1</i>    | H3K27ac | Flanking TSS/Enhancers |
| 5  | 173161132 | 173161632 | 5q35.2   | -1.4  | 0.000203 | ENSG00000253686 | <i>LINC01484</i> | H3K27ac | Flanking TSS/Enhancers |
| 9  | 133667406 | 133667906 | 9q34.12  | -2.88 | 0.0407   | ENSG00000097007 | <i>ABL1</i>      | H3K27ac | Flanking TSS/Enhancers |
| 10 | 13818774  | 13819274  | 10p13    | -1.14 | 0.0129   | ENSG00000151474 | <i>FRMD4A</i>    | H3K27ac | Flanking TSS/Enhancers |
| 10 | 94003003  | 94003503  | 10q23.32 | 2.32  | 0.0121   | ENSG00000107864 | <i>CPEB3</i>     | H3K27ac | Flanking TSS/Enhancers |
| 11 | 58967057  | 58967557  | 11q12.1  | -1.37 | 0.038    | ENSG00000110042 | <i>DTX4</i>      | H3K27ac | Flanking TSS/Enhancers |
| 14 | 72085035  | 72085535  | 14q24.2  | -1.71 | 0.00779  | ENSG00000197555 | <i>SIPA1L1</i>   | H3K27ac | Flanking TSS/Enhancers |
| 18 | 77257219  | 77257719  | 18q23    | -2.67 | 0.00228  | ENSG00000131196 | <i>NFATC1</i>    | H3K27ac | Flanking TSS/Enhancers |
| 22 | 49897247  | 49897747  |          | -6.04 | 8.80E-09 | ENSG00000188511 | <i>C22orf34</i>  | H3K27ac | Flanking TSS/Enhancers |
| 3  | 93789910  | 93790410  | 3q11.2   | -1.83 | 4.96E-06 | ENSG00000178694 | <i>NSUN3</i>     | H3K4me1 | Flanking TSS/Enhancers |
| 15 | 60841291  | 60841791  | 15q22.2  | -1.4  | 0.0469   | ENSG00000069667 | <i>RORA</i>      | H3K4me1 | Flanking TSS/Enhancers |
| 18 | 77256680  | 77257180  | 18q23    | -1.78 | 7.63E-05 | ENSG00000131196 | <i>NFATC1</i>    | H3K4me1 | Flanking TSS/Enhancers |
| 22 | 49897674  | 49898174  | 22q13.33 | -3.43 | 8.12E-10 | ENSG00000188511 | <i>C22orf34</i>  | H3K4me1 | Flanking TSS/Enhancers |
| 17 | 14205874  | 14206374  | 17p12    | -4.46 | 0.00464  | ENSG00000125430 | <i>HS3ST3B1</i>  | H3K27ac | Bivalent/Poised TSS    |
| 12 | 16081687  | 16082187  | 12p12.3  | -2.58 | 0.0177   | ENSG00000023697 | <i>DERA</i>      | H3K27ac | Enhancers              |
| 1  | 41305990  | 41306490  | 1p34.2   | -3.23 | 0.00464  | ENSG00000117013 | <i>KCNQ4</i>     | H3K27ac | Enhancers              |
| 1  | 165853916 | 165854416 | 1q24.1   | -1.5  | 0.0425   | ENSG00000143179 | <i>UCK2</i>      | H3K27ac | Enhancers              |
| 2  | 136345249 | 136345749 | 2q21.3   | -3.34 | 0.00432  | ENSG00000048991 | <i>R3HDM1</i>    | H3K27ac | Enhancers              |
| 3  | 123879214 | 123879714 | 3q21.1   | -3.53 | 0.0425   | ENSG00000160145 | <i>KALRN</i>     | H3K27ac | Enhancers              |
| 5  | 60822922  | 60823422  | 5q12.1   | 2.23  | 0.037    | ENSG00000130449 | <i>ZSWIM6</i>    | H3K27ac | Enhancers              |
| 5  | 153693113 | 153693613 | 5q33.2   | -1.7  | 0.00872  | ENSG00000164574 | <i>GALNT10</i>   | H3K27ac | Enhancers              |
| 5  | 179344153 | 179344653 | 5q35.3   | -2.62 | 0.0117   | ENSG00000113269 | <i>RNF130</i>    | H3K27ac | Enhancers              |
| 7  | 37394096  | 37394596  | 7p14.1   | 2.15  | 0.0118   | ENSG00000155849 | <i>ELMO1</i>     | H3K27ac | Enhancers              |

|    |           |           |          |       |          |                 |                   |         |                              |
|----|-----------|-----------|----------|-------|----------|-----------------|-------------------|---------|------------------------------|
| 8  | 120656219 | 120656719 | 8q24.12  | -1.57 | 0.0157   | ENSG00000136960 | <i>ENPP2</i>      | H3K27ac | Enhancers                    |
| 10 | 13796151  | 13796651  | 10p13    | -1.18 | 0.0219   | ENSG00000151474 | <i>FRMD4A</i>     | H3K27ac | Enhancers                    |
| 10 | 90041861  | 90042361  | 10q23.31 | -1.96 | 0.000302 | ENSG00000184719 | <i>RNLS</i>       | H3K27ac | Enhancers                    |
| 12 | 122446969 | 122447469 | 12q24.31 | 2.15  | 0.034    | ENSG00000255856 | <i>AC069503.1</i> | H3K27ac | Enhancers                    |
| 14 | 32129264  | 32129764  | 14q12    | -2.45 | 0.0155   | ENSG00000151413 | <i>NUBPL</i>      | H3K27ac | Enhancers                    |
| 16 | 11051932  | 11052432  | 16p13.13 | -1.42 | 0.0397   | ENSG00000038532 | <i>CLEC16A</i>    | H3K27ac | Enhancers                    |
| 16 | 11224314  | 11224814  | 16p13.13 | -2.8  | 0.00307  | ENSG00000038532 | <i>CLEC16A</i>    | H3K27ac | Enhancers                    |
| 16 | 17199254  | 17199754  | 16p12.3  | -3.53 | 0.00569  | ENSG00000103489 | <i>XYLT1</i>      | H3K27ac | Enhancers                    |
| 16 | 58887920  | 58888420  | 16q21    | -1.83 | 0.00569  | ENSG00000245768 | <i>AC106793.1</i> | H3K27ac | Enhancers                    |
| 17 | 33359545  | 33360045  | 17q12    | -1.36 | 0.0129   | ENSG00000092871 | <i>RFFL</i>       | H3K27ac | Enhancers                    |
| 17 | 33373148  | 33373648  | 17q12    | -1.38 | 0.0168   | ENSG00000092871 | <i>RFFL</i>       | H3K27ac | Enhancers                    |
| 19 | 2255695   | 2256195   | 19p13.3  | 1.69  | 0.0256   | ENSG00000167476 | <i>JSRP1</i>      | H3K27ac | Enhancers                    |
| 20 | 32158190  | 32158690  | 20q11.21 | -1.15 | 0.0233   | ENSG00000078699 | <i>CBFA2T2</i>    | H3K27ac | Enhancers                    |
| 20 | 45217451  | 45217951  | 20q13.12 | -2.64 | 0.0292   | ENSG00000158296 | <i>SLC13A3</i>    | H3K27ac | Enhancers                    |
| 21 | 44079160  | 44079660  | 21q22.3  | -4.01 | 0.0118   | ENSG00000160191 | <i>PDE9A</i>      | H3K27ac | Enhancers                    |
| 22 | 46817320  | 46817820  | 22q13.31 | -3.91 | 0.00464  | ENSG00000075275 | <i>CELSR1</i>     | H3K27ac | Enhancers                    |
| 3  | 46772864  | 46773364  | 3p21.31  | 1.97  | 0.0209   | ENSG00000206549 | <i>PRSS50</i>     | H3K4me1 | Enhancers                    |
| 22 | 49908301  | 49908801  | 22q13.33 | -4.33 | 0.0203   | ENSG00000188511 | <i>C22orf34</i>   | H3K4me1 | Enhancers                    |
| 14 | 35630601  | 35631101  | 14q13.2  | -1.25 | 0.0206   | ENSG00000100890 | <i>PRORP</i>      | H3K27ac | Enhancers/Weak transc        |
| 15 | 36895734  | 36896234  | 15q14    | -2.43 | 0.0129   | ENSG00000186073 | <i>CDIN1</i>      | H3K27ac | Enhancers/Weak transc        |
| 15 | 60851386  | 60851886  | 15q22.2  | -2.28 | 0.0425   | ENSG00000069667 | <i>RORA</i>       | H3K27ac | Enhancers/Weak transc        |
| 19 | 2546237   | 2546737   | 19p13.3  | 4.04  | 0.000811 | ENSG00000176533 | <i>GNG7</i>       | H3K27ac | Enhancers/Weak transc        |
| 19 | 5330547   | 5331047   | 19p13.3  | -2.81 | 0.0101   | ENSG00000105426 | <i>PTPRS</i>      | H3K27ac | Enhancers/Weak transc        |
| 3  | 171129732 | 171130232 | 3q26.31  | -2.05 | 0.0109   | ENSG00000154310 | <i>TNIK</i>       | H3K27ac | Genic enhancers              |
| 4  | 185331075 | 185331575 | 4q35.1   | 1.38  | 0.0194   | ENSG00000168310 | <i>IRF2</i>       | H3K27ac | Genic enhancers              |
| 20 | 45964503  | 45965003  | 20q13.12 | -2.24 | 0.0177   | ENSG00000101040 | <i>ZMYND8</i>     | H3K27ac | Genic Enhancers              |
| 21 | 34786908  | 34787408  | 21q22.11 | -2.48 | 0.0218   | ENSG00000159128 | <i>IFNGR2</i>     | H3K27ac | Genic Enhancers              |
| 22 | 38314372  | 38314872  | 22q13.1  | -2.53 | 0.00779  | ENSG00000100139 | <i>MICALL1</i>    | H3K27ac | Genic Enhancers              |
| 16 | 58623730  | 58624230  | 16q21    | -2.28 | 0.000238 | ENSG00000125107 | <i>CNOT1</i>      | H3K4me1 | Genic enhancers              |
| 10 | 6143334   | 6143834   | 10p15.1  | -1.69 | 0.0411   | ENSG00000134453 | <i>RBM17</i>      | H3K27ac | Transcription gene 5p and 3p |

|    |           |           |          |       |          |                 |                   |         |                              |
|----|-----------|-----------|----------|-------|----------|-----------------|-------------------|---------|------------------------------|
| 16 | 25018195  | 25018695  | 16p12.1  | -1.94 | 0.0278   | ENSG00000140750 | <i>ARHGAP17</i>   | H3K27ac | Transcription gene 5p and 3p |
| 7  | 64146636  | 64147136  | 7q11.21  | -3.36 | 0.0374   | ENSG00000196247 | <i>ZNF107</i>     | H3K27ac | ZNF genes + repeats          |
| 12 | 32119581  | 32120081  | 12p11.21 | -1.57 | 0.00779  | ENSG00000174718 | <i>RESF1</i>      | H3K27ac | ZNF genes + repeats          |
| 7  | 64146572  | 64147072  | 7q11.21  | -2.24 | 0.0382   | ENSG00000196247 | <i>ZNF107</i>     | H3K4me1 | ZNF genes + repeats          |
| 7  | 129831493 | 129831993 | 7q32.2   | -3.26 | 0.00307  | ENSG00000146842 | <i>TMEM209</i>    | H3K27ac | Strong transcription         |
| 10 | 70964148  | 70964648  | 10q22.1  | -2.4  | 0.032    | ENSG00000156502 | <i>SUPV3L1</i>    | H3K27ac | Strong transcription         |
| 12 | 132480425 | 132480925 | 12q24.33 | -4.49 | 0.038    | ENSG00000183495 | <i>EP400</i>      | H3K27ac | Strong transcription         |
| 20 | 33602304  | 33602804  | 20q11.22 | -3.08 | 0.0374   | ENSG00000100991 | <i>TRPC4AP</i>    | H3K27ac | Strong transcription         |
| 22 | 47086281  | 47086781  | 22q13.31 | 3.32  | 0.0245   | ENSG00000100422 | <i>CERK</i>       | H3K27ac | Strong transcription         |
| 2  | 233104576 | 233105076 | 2q37.1   | -2.23 | 0.00779  | ENSG00000144535 | <i>DIS3L2</i>     | H3K27ac | Strong transcription         |
| 2  | 106475498 | 106475998 | 2q12.2   | -2.22 | 0.00872  | ENSG00000071051 | <i>NCK2</i>       | H3K27ac | Weak transcription           |
| 11 | 130107477 | 130107977 | 11q24.3  | -3.06 | 0.033    | ENSG00000196323 | <i>ZBTB44</i>     | H3K27ac | Weak transcription           |
| 14 | 64461590  | 64462090  | 14q23.2  | -2.07 | 0.038    | ENSG00000054654 | <i>SYNE2</i>      | H3K27ac | Weak transcription           |
| 14 | 76297724  | 76298224  | 14q24.3  | 2.63  | 0.0258   | ENSG00000119685 | <i>TLL5</i>       | H3K27ac | Weak transcription           |
| 17 | 78860071  | 78860571  | 17q25.3  | -5.61 | 4.81E-06 | ENSG00000141564 | <i>RPTOR</i>      | H3K27ac | Weak transcription           |
| 20 | 32356760  | 32357260  | 20q11.22 | -1.68 | 0.0233   | ENSG00000131061 | <i>ZNF341</i>     | H3K27ac | Weak transcription           |
| X  | 135766274 | 135766774 | Xq26.3   | -2.98 | 0.0118   | ENSG00000129675 | <i>ARHGEF6</i>    | H3K27ac | Weak transcription           |
| 17 | 78860167  | 78860667  | 17q25.3  | -3.87 | 0.000131 | ENSG00000141564 | <i>RPTOR</i>      | H3K4me1 | Weak transcription           |
| 7  | 116709625 | 116710125 | 7q31.2   | -1.4  | 0.0118   | ENSG00000004866 | <i>ST7</i>        | H3K27ac | Heterochromatin              |
| 17 | 78630029  | 78630529  | 17q25.3  | -4.2  | 0.0082   | ENSG00000141564 | <i>RPTOR</i>      | H3K27ac | Heterochromatin              |
| 13 | 22615288  | 22615788  | 3q12.11  | -4.14 | 0.0114   | N/A             | N/A               | H3K4me3 | Heterochromatin              |
| 14 | 33999826  | 34000326  | 14q13.1  | -4.65 | 0.0186   | ENSG00000151322 | <i>NPAS3</i>      | H3K27ac | Weak Repressed PolyComb      |
| 17 | 14212166  | 14212666  | 17p12    | -4.7  | 0.0279   | ENSG00000125430 | <i>HS3ST3B1</i>   | H3K27ac | Weak Repressed PolyComb      |
| 18 | 53072601  | 53073101  | 18q23    | -4.35 | 0.00604  | ENSG00000196628 | <i>TCF4</i>       | H3K27ac | Weak Repressed PolyComb      |
| 1  | 99198701  | 99199201  | 1p21.3   | 2.54  | 0.0162   | ENSG00000162627 | <i>SNX7</i>       | H3K27ac | Quiescent/low                |
| 6  | 74104448  | 74104948  | 6q13     | -4.93 | 0.0143   | ENSG00000080007 | <i>DDX43</i>      | H3K27ac | Quiescent/low                |
| 6  | 128813045 | 128813545 | 6q22.33  | -2.94 | 0.0206   | ENSG00000152894 | <i>PTPRK</i>      | H3K27ac | Quiescent/low                |
| 7  | 120017530 | 120018030 | 7q31.31  | -2.18 | 0.0292   | ENSG00000184408 | <i>KCND2</i>      | H3K27ac | Quiescent/low                |
| 8  | 41612253  | 41612753  | 8p11.21  | -3.38 | 0.0135   | ENSG00000029534 | <i>ANK1</i>       | H3K27ac | Quiescent/low                |
| 14 | 36488285  | 36488785  | 14q13.2  | -2.76 | 0.0234   | ENSG00000258342 | <i>AL133304.3</i> | H3K27ac | Quiescent/low                |

|    |           |           |         |       |         |                 |               |         |               |
|----|-----------|-----------|---------|-------|---------|-----------------|---------------|---------|---------------|
| 15 | 36914366  | 36914866  | 15q14   | -2.58 | 0.00779 | ENSG00000186073 | <i>CDIN1</i>  | H3K27ac | Quiescent/low |
| 17 | 62602247  | 62602747  | 17q24.1 | -3.29 | 0.00598 | ENSG00000108854 | <i>SMURF2</i> | H3K27ac | Quiescent/low |
| X  | 41745567  | 41746067  | Xp11.4  | -2.83 | 0.00598 | ENSG00000147044 | <i>CASK</i>   | H3K27ac | Quiescent/low |
| X  | 100740485 | 100740985 | Xq22.1  | 3.15  | 0.00422 | ENSG00000196440 | <i>ARMCX4</i> | H3K4me3 | Quiescent/low |
| 1  | 99202512  | 99203012  | 1p21.3  | 2.9   | 0.0469  | ENSG00000162627 | <i>SNX7</i>   | H3K4me1 | Quiescent/low |

**Additional Table 6.** Closest differential peaks to differentially expressed genes.

| Peak start | Peak end  | Peak Fold Change | Peak FDR | Chromosome | distance to DEG | closest DEG         | DEG Fold Change | DEG FDR     |
|------------|-----------|------------------|----------|------------|-----------------|---------------------|-----------------|-------------|
| 12769562   | 12770062  | -4.73            | 0.00446  | 17         | 0               | <i>ARHGAP44</i>     | -3.07704319     | 0.008799439 |
| 14205874   | 14206374  | -4.46            | 0.00464  | 17         | 0               | <i>HS3ST3B1</i>     | -3.63211782     | 0.02527202  |
| 14212166   | 14212666  | -4.7             | 0.0279   | 17         | 0               | <i>HS3ST3B1</i>     | -3.63211782     | 0.02527202  |
| 14205874   | 14206374  | -4.46            | 0.00464  | 17         | 797             | <i>RP11-214O1.2</i> | -3.883684724    | 0.072608715 |
| 58967057   | 58967557  | -1.37            | 0.038    | 11         | 8426            | <i>MPEG1</i>        | -1.071142972    | 0.150495663 |
| 13796151   | 13796651  | -1.18            | 0.0219   | 10         | 69278           | <i>RP11-295P9.8</i> | -2.092655499    | 0.02527202  |
| 34786908   | 34787408  | -2.48            | 0.0218   | 21         | 88830           | <i>GART</i>         | -0.343925791    | 0.096098453 |
| 132480425  | 132480925 | -4.49            | 0.038    | 12         | 144098          | <i>MMP17</i>        | -2.150832048    | 0.095434155 |
| 44079160   | 44079660  | -4.01            | 0.0118   | 21         | 183544          | <i>WDR4</i>         | -0.492334752    | 0.097944358 |
| 132480425  | 132480925 | -4.49            | 0.038    | 12         | 190362          | <i>LINC02361</i>    | -2.357074614    | 0.143870479 |
| 136345249  | 136345749 | -3.34            | 0.00432  | 2          | 232012          | <i>LCT-AS1</i>      | -1.876291567    | 0.157962777 |
| 100740485  | 100740985 | 3.15             | 0.00422  | X          | 753376          | <i>SYTL4</i>        | -3.962096381    | 0.122342846 |

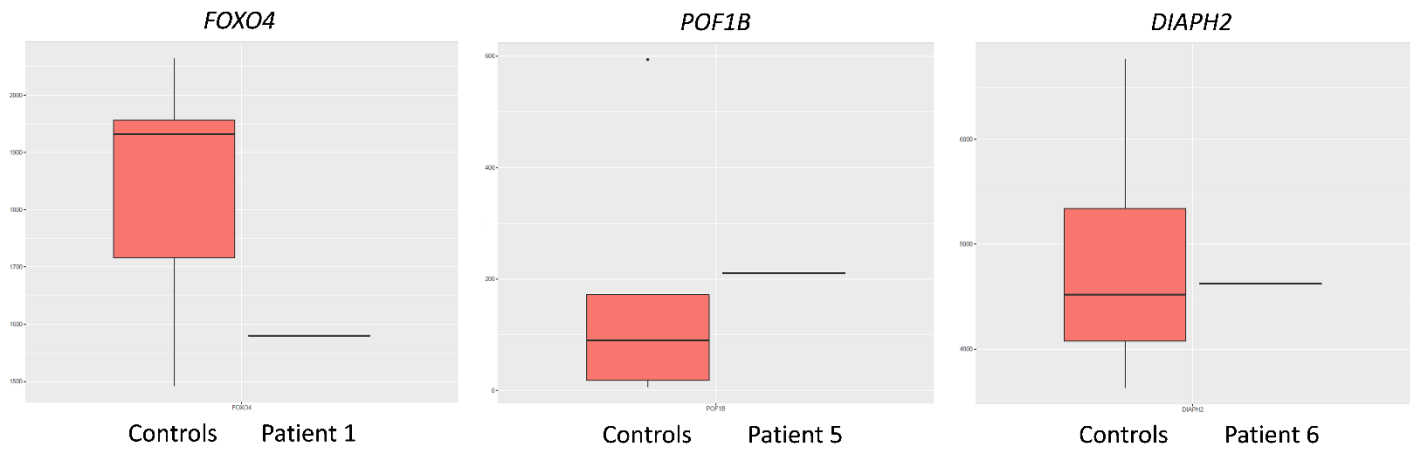

**Additional Figure 1. FPKM expression levels of position effect candidate genes. No significant alteration was observed at corresponding patient's LCLs.**

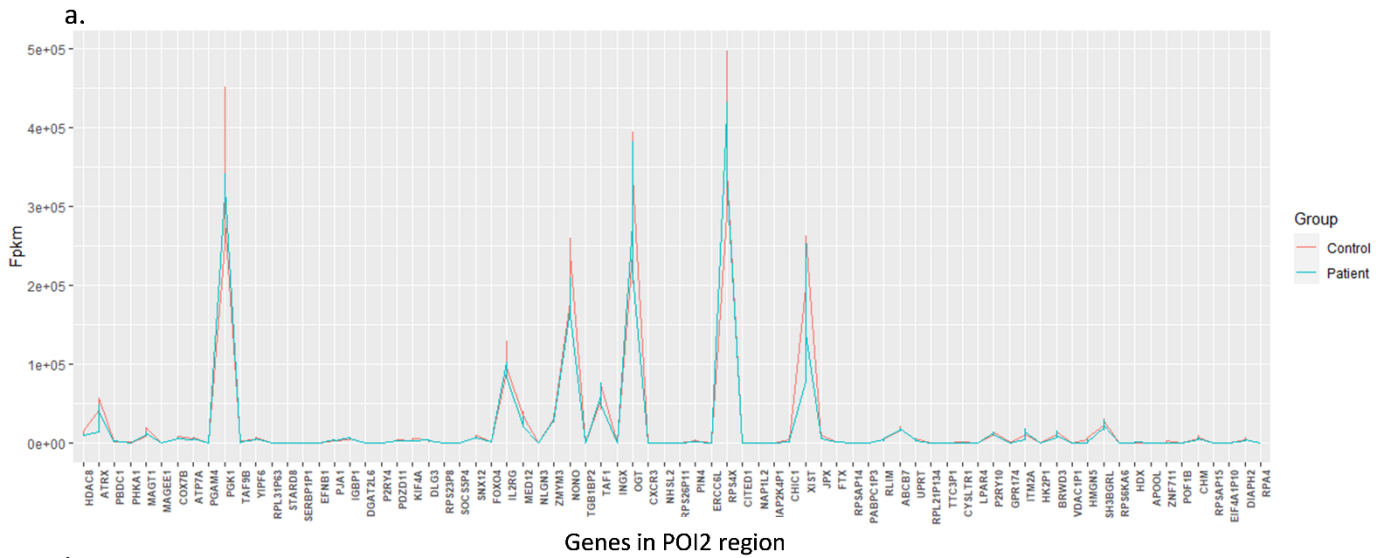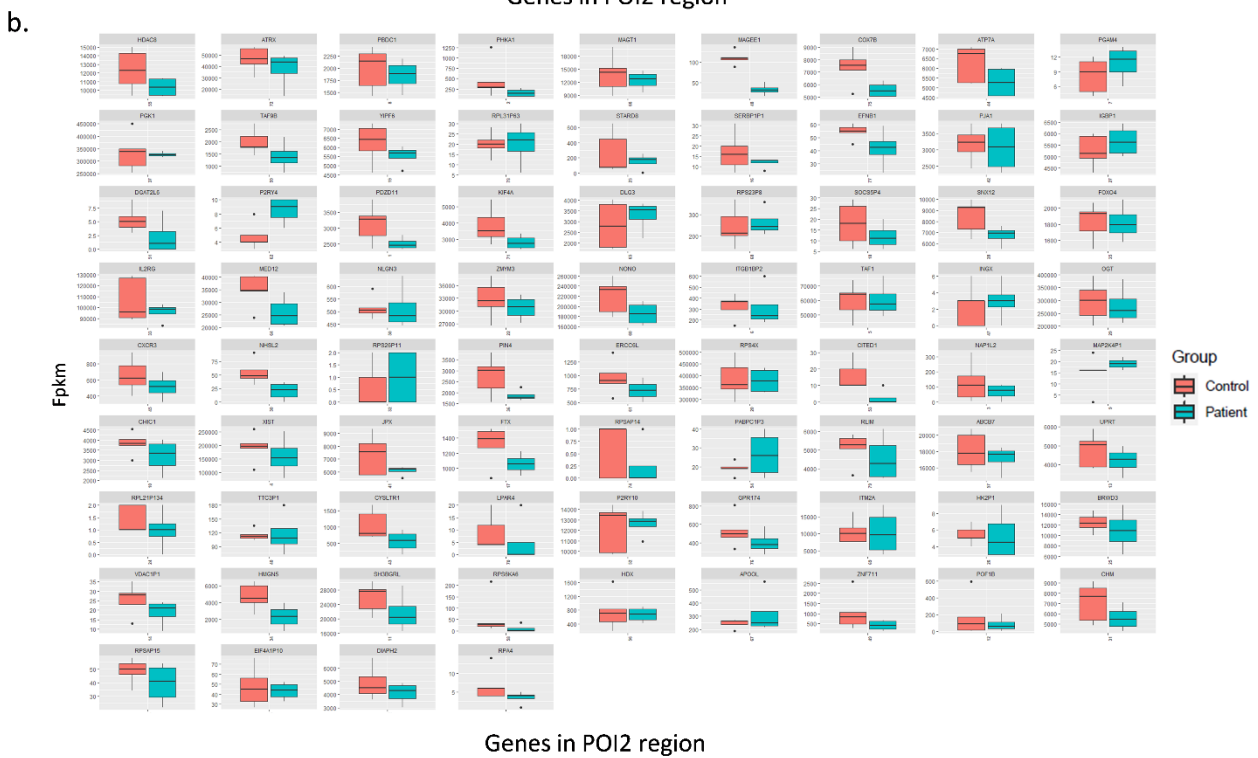

**Additional Figure 2. FPKM expression levels of 76 genes in POI2 region. a.** Mean FPKM within groups (patients - P1, P2, P4, P5, and controls) among Xq13 to Xq21 genes, being displayed according to genomic localization in order to visualize the expression pattern throughout coordinates. **b.** Expression comparison between patients (blue) and controls (pink) for each gene in POI2 region.



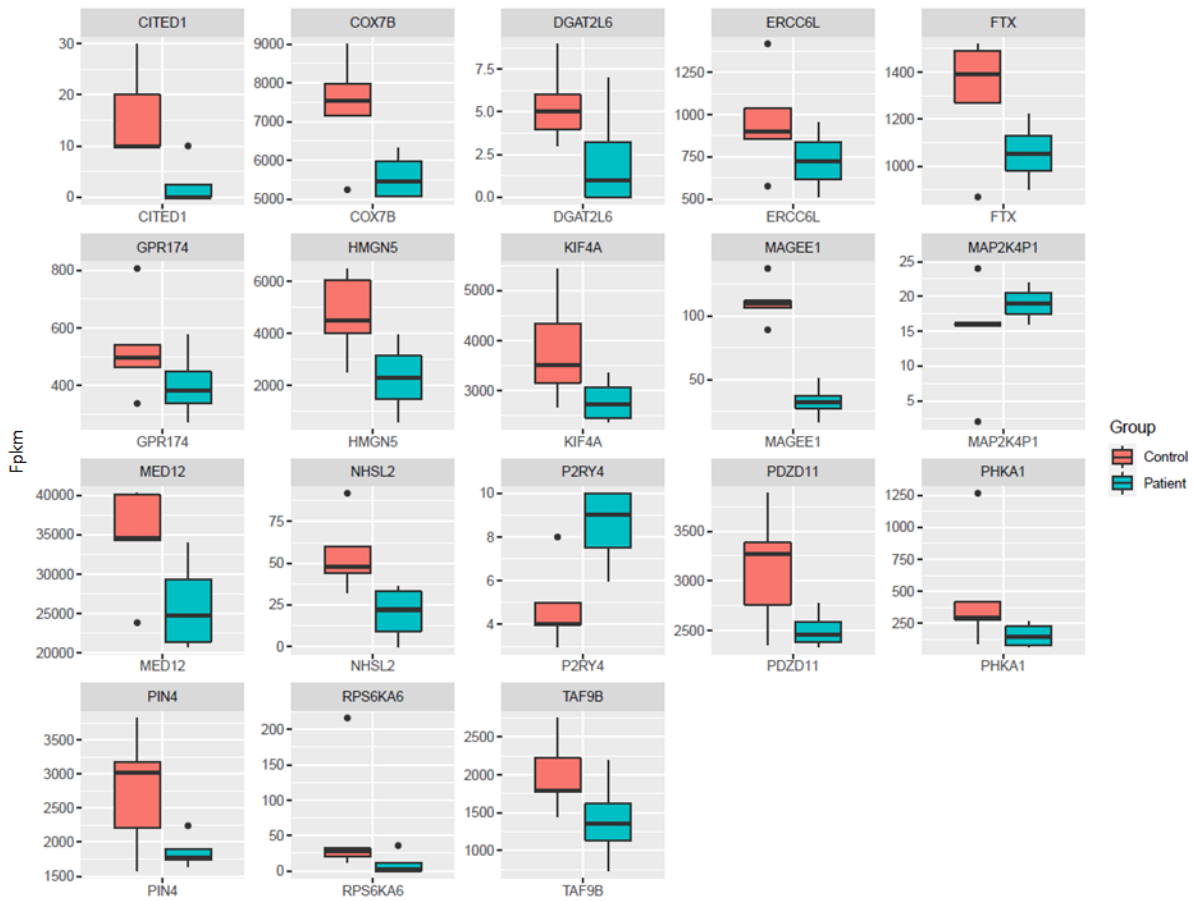

**Additional Figure 3. FPKM expression levels of genes in POI2 region comparing the patients' group (P1, P2, P4, P5) and the control group. 18 out of 76 genes in which the lower quartile of one group did not overlap with the higher quartile of the other.**

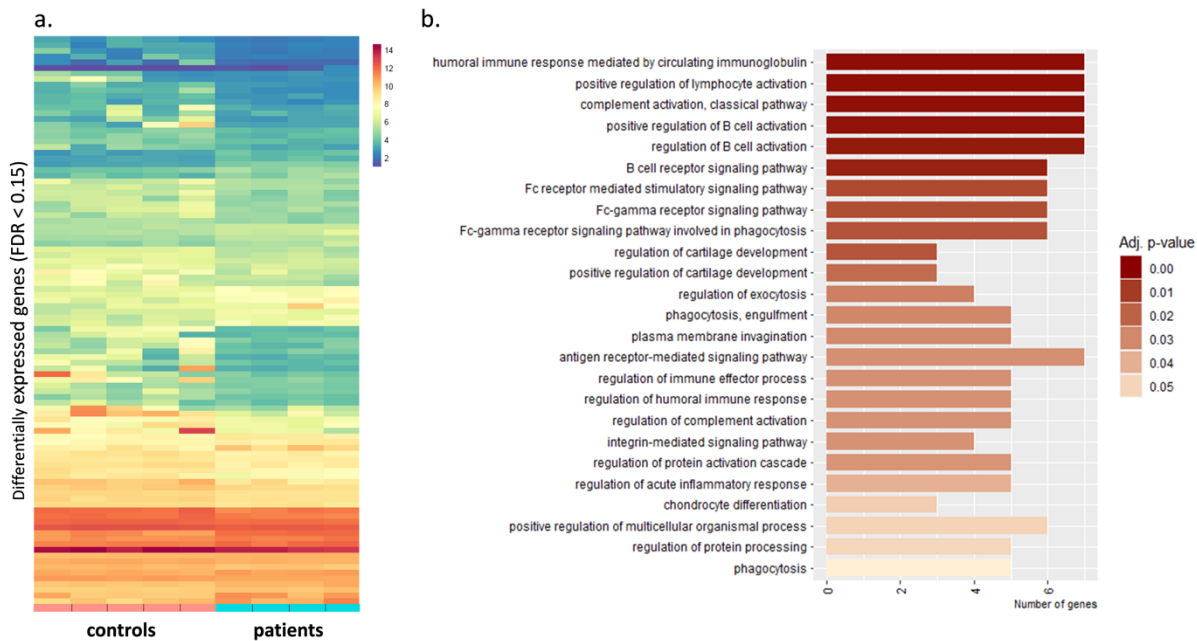

**Additional Figure 4. Transcriptome profiling.** **a.** Heatmap showing differentially expressed genes between patients (blue bar) and female controls (pink bar) (FDR < 0.15). **b.** Enriched pathways related to DEG.

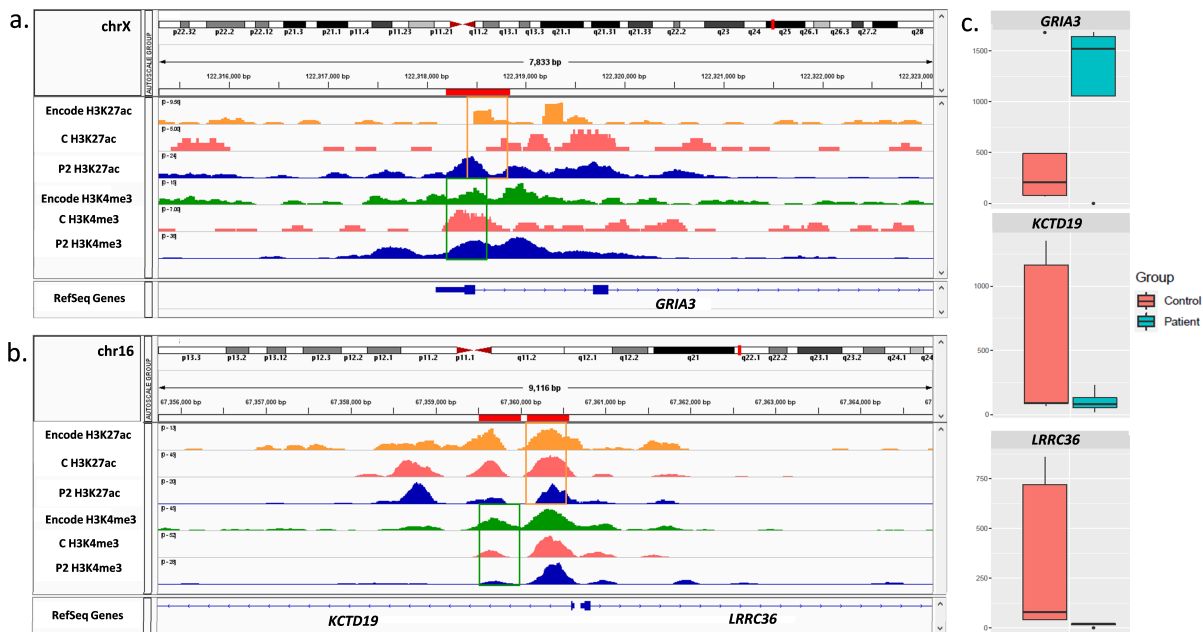

**Additional Figure 5. IGV visualization of differential peaks at Xq25 and 16q22 from patient 2 and expression levels of *GRIA3*, *KCTD19*, and *LRRC36* genes.** IGV tracks: Encode GM12878 H3K27ac in orange and H3K4me3 in green. H3K27ac and H3K4me3 peaks from patient 2 (as an example for all patients) are shown in blue and from matched control in pink. RefSeq genes are shown in the bottom. **a.** Overlapping peaks at the promoter region of *GRIA3* in Xq25 with both peaks increased in patients. **b.** Peaks in the promoter region of *KCTD19* and *LRRC36* genes in 16q22.1 are decreased in patients. **c.** FPKM expression levels showing upregulation trend of *GRIA3* gene and downregulation trend of *KCTD19* and *LRRC36* genes.

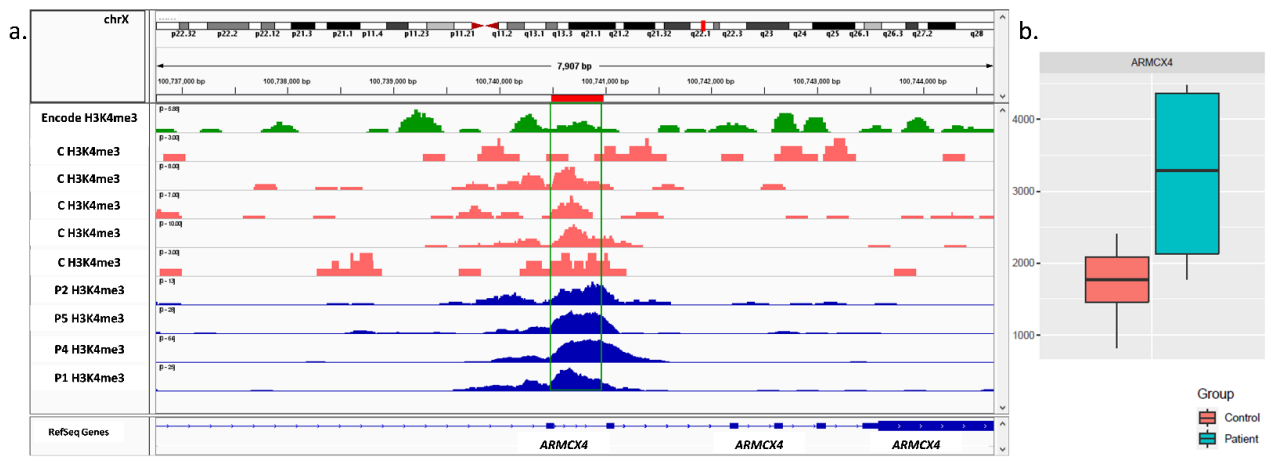

**Additional Figure 6. IGV visualization of differential peak overlaps in Xq22.1 and FPKM expression level of the *ARMCX4* gene. IGV tracks:** Encode GM12878 H3K4me3 in green, and RefSeq genes. **a.** H3K4me3 peak in patients (blue) and controls (pink) at the *ARMCX4* gene. Note that H3K4me3 is increased in patients. **b.** Upregulation trend of *ARMCX4* in patients.
